# Supplementary material for: CEACAM1 promotes melanoma metastasis and is involved in the regulation of the EMT associated gene network in melanoma cells
Source: PubMed Central journal article supplement (PMC6082866; doi:10.1038/s41598-018-30338-4), 2018-08-08
Supplement: 41598_2018_30338_MOESM1_ESM.pdf [file 41598_2018_30338_MOESM1_ESM.pdf]

## Supplementary Information

### **CEACAM1 promotes melanoma metastasis and is involved in the regulation of the EMT associated gene network in melanoma cells**

Daniel Wicklein<sup>1</sup>, Benjamin Otto<sup>2,3</sup>, Anna Suling<sup>4</sup>, Eva Elies<sup>1</sup>, Georg Lüers<sup>1</sup>, Tobias Lange<sup>1</sup>, Susanne Feldhaus<sup>1</sup>, Hanna Maar<sup>1</sup>, Jennifer Schröder-Schwarz<sup>1</sup>, Georg Brunner<sup>5</sup>, Christoph Wagener<sup>6\*</sup>, Udo Schumacher<sup>1\*</sup>

\* These authors equally contributed to this work.

1 Institute of Anatomy and Experimental Morphology, University Cancer Center, University Medical-Center Hamburg-Eppendorf, Hamburg, Germany

2 Eppendorf AG, Hamburg, Germany

3 Department of Medicine I, University Medical Center Hamburg-Eppendorf, Hamburg, Germany

4 Department of Medical Biometry and Epidemiology, University Medical Center Hamburg-Eppendorf, Hamburg, Germany

5 Department of Cancer Research, Fachklinik Hornheide, Münster, Germany. Present address: NeraCare GmbH, Bönen, Germany

6 Center for Diagnostics, University Medical Center Hamburg-Eppendorf, Hamburg, Germany

#### **Corresponding author:**

Daniel Wicklein, PhD,  
Institute of Anatomy and Experimental Morphology, University Cancer Center,  
University Medical Center Hamburg-Eppendorf

Martinistrasse 52  
20246 Hamburg

Phone: (+)49-40-7410-52591

FAX: (+)49-40-7410-55427

Email: [d.wicklein@uke.de](mailto:d.wicklein@uke.de)

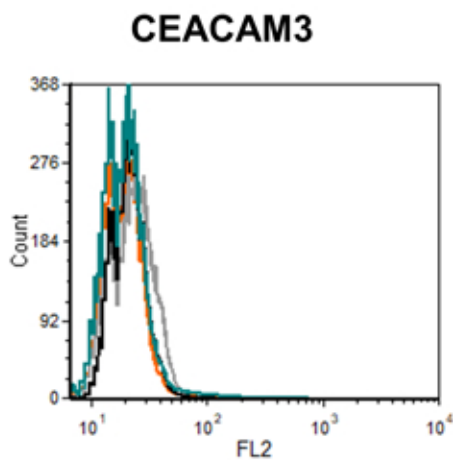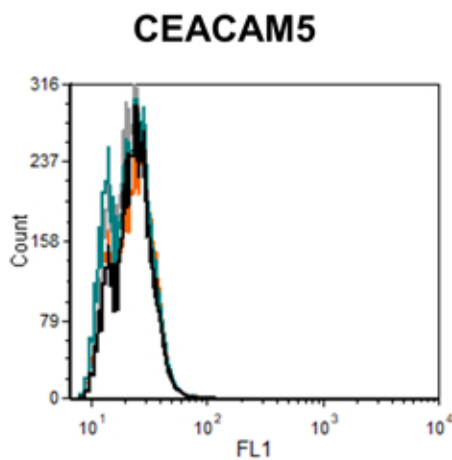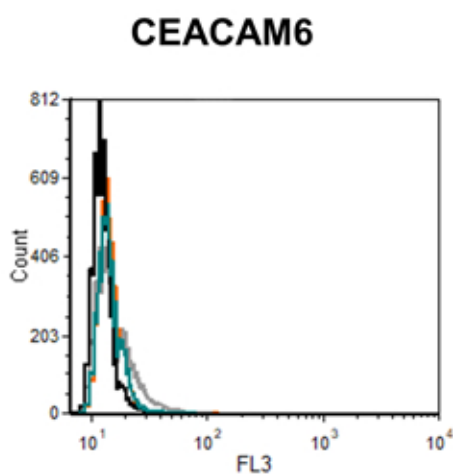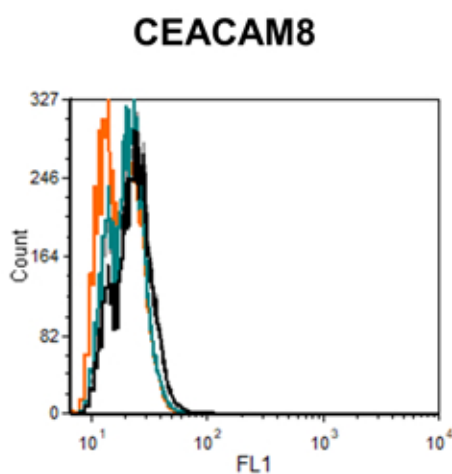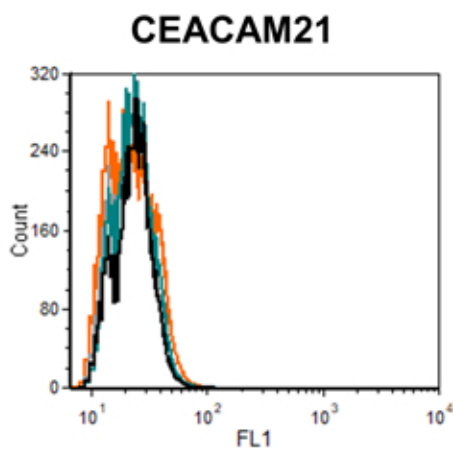

**Supplementary Figure 1:** No in vitro expression of CEACAMs other than CEACAM1. Flow Cytometry for fixed and permeabilized cells. Staining of MeWo CEACAM1 kd (orange curve, respective isotype control in grey) and MeWo Luc (teal, respective isotype control in black) for CEACAM3, 5, 6, 8 and 21, respectively.

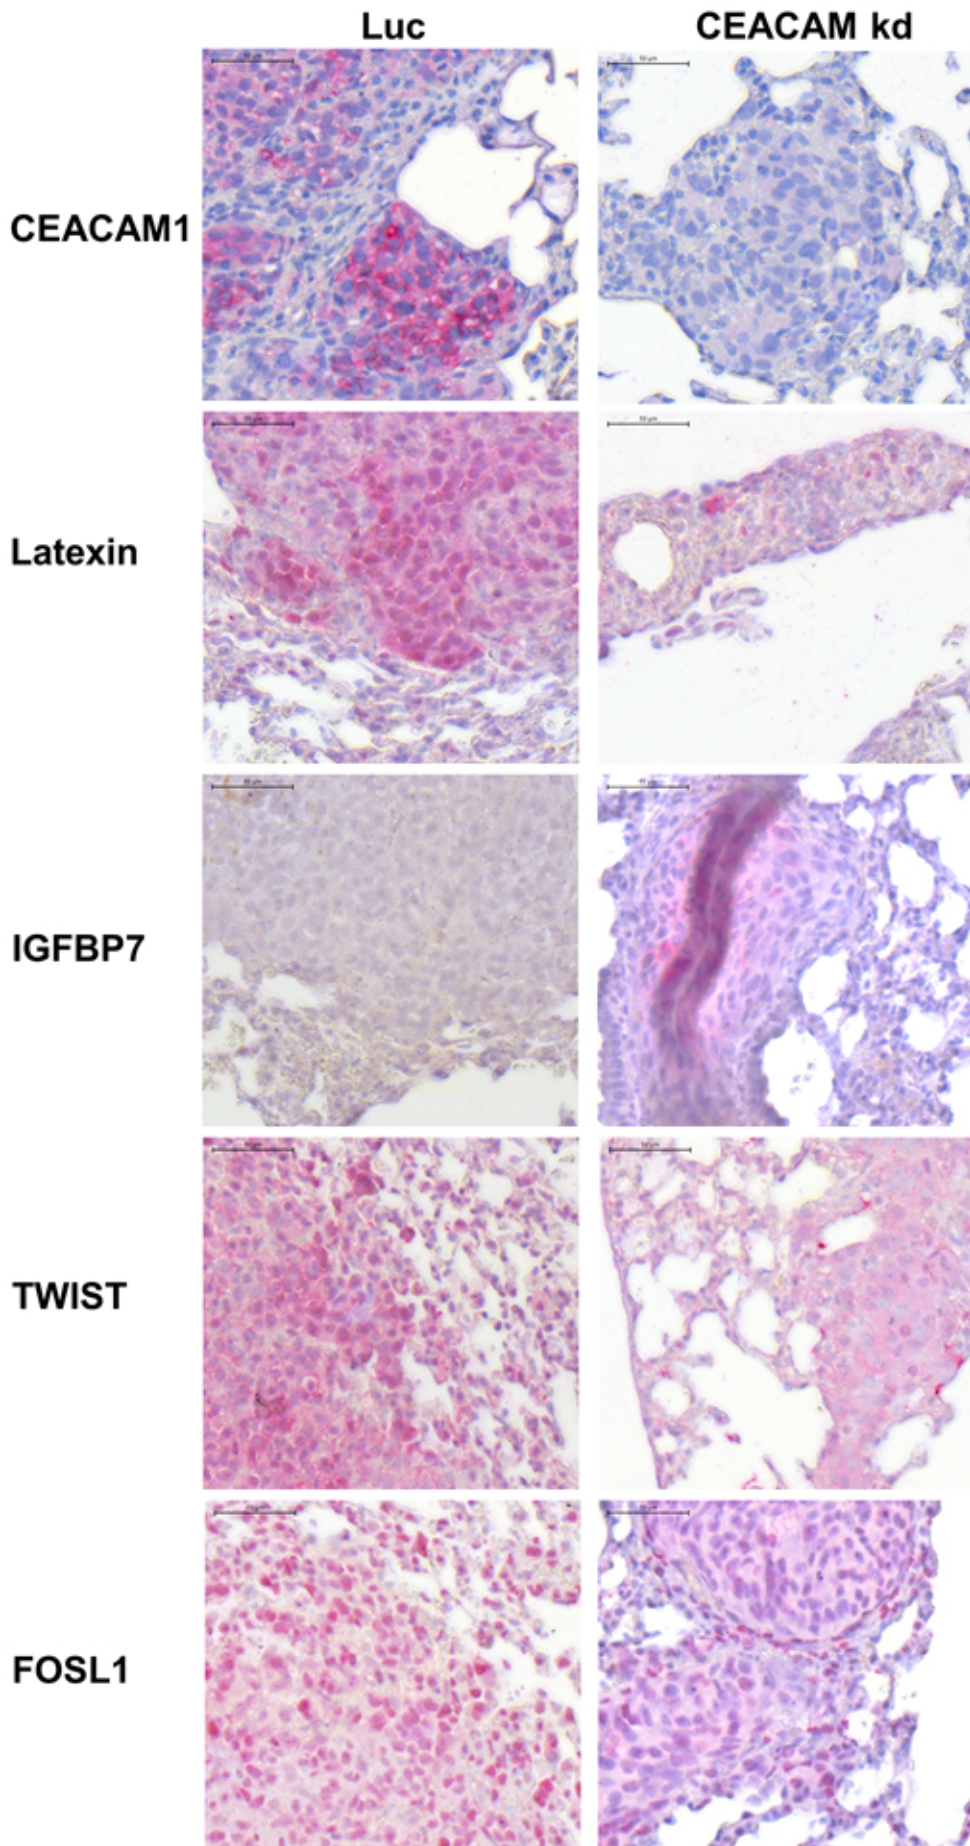

**Supplementary Figure 2**  
 Comparison of CEACAM1, Latexin, IGFBP7, TWSIT1 and FOSL1 expression in the xenograft lung metastases. Immunohistochemical staining of paraffin embedded mouse lung tissue (xenograft subcutaneous primary MeWo tumors in scid mice) for CEACAM1, Latexin, IGFBP7, TWIST and FOSL1 demonstrated respective up- or downregulation of these proteins in the lung metastases induced by CEACAM kd or Luc control tumors.



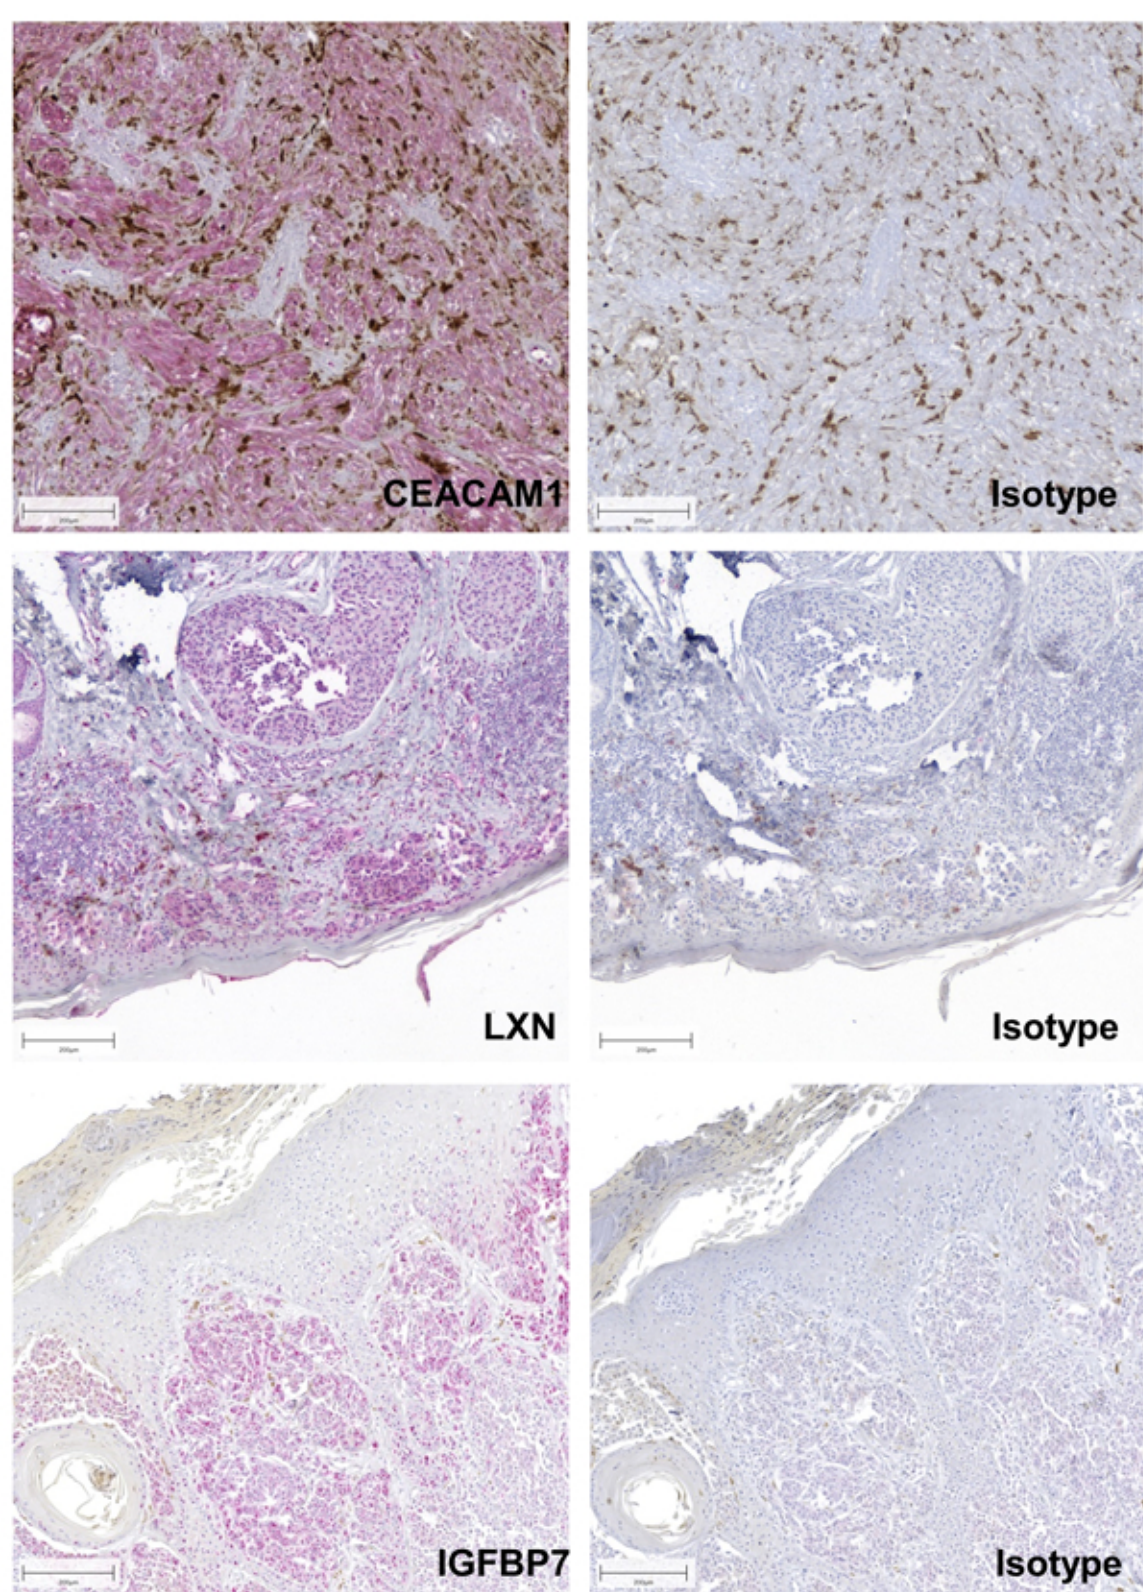

**Supplementary Figure 3:** Immunohistochemical staining of paraffin embedded patient melanoma tissue for CEACAM1 (upper panel), Latexin (LXN, middle panel) and IGFBP7 (lower panel) and the respective Isotype Controls. scale bar: 200µm



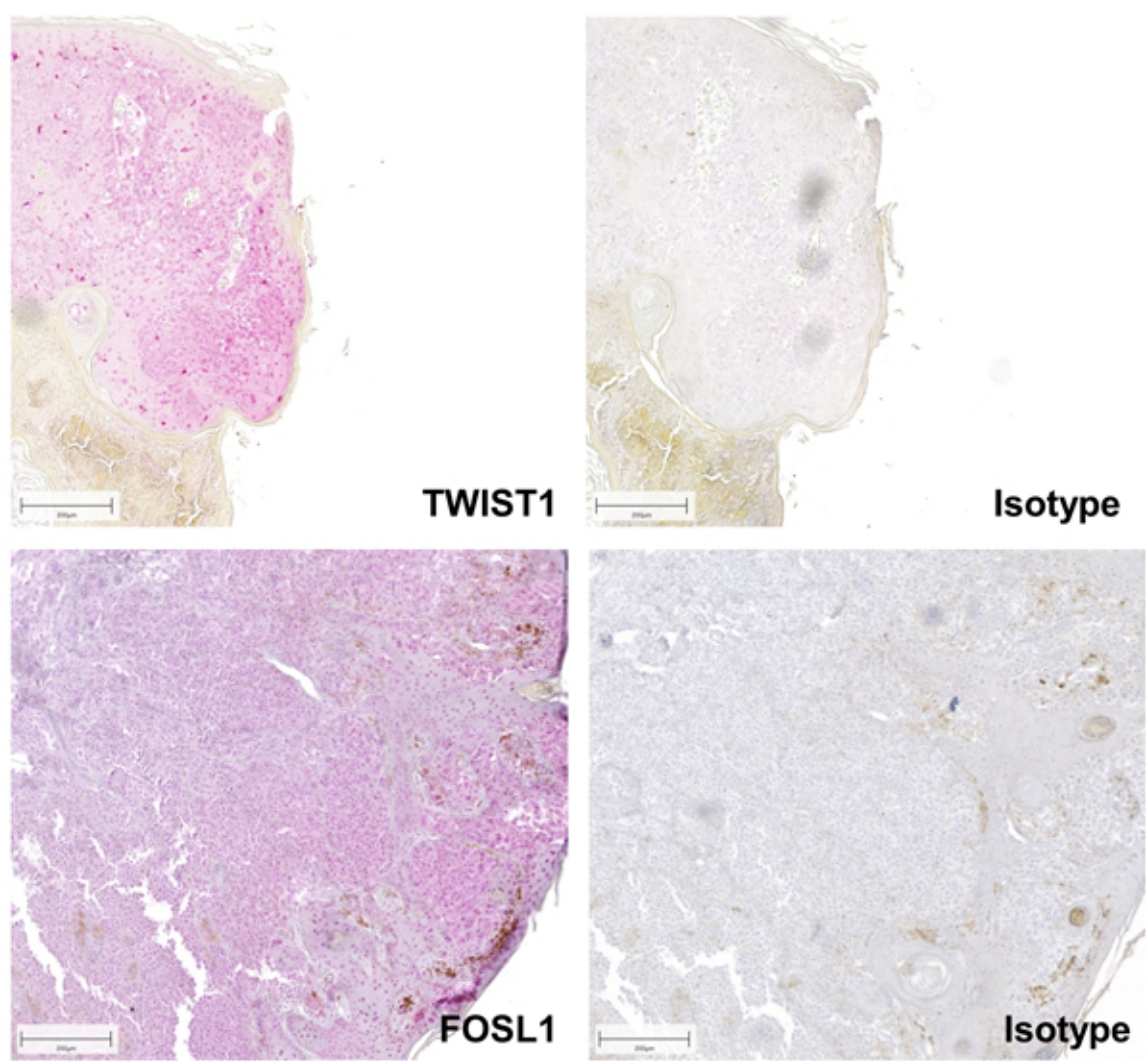

**Supplementary Figure 4:** Immunohistochemical staining of paraffin embedded patient melanoma tissue for TWIST1 (upper panel) and Fra-1 (lower panel) and the respective Isotype Controls. scale bar: 200µm

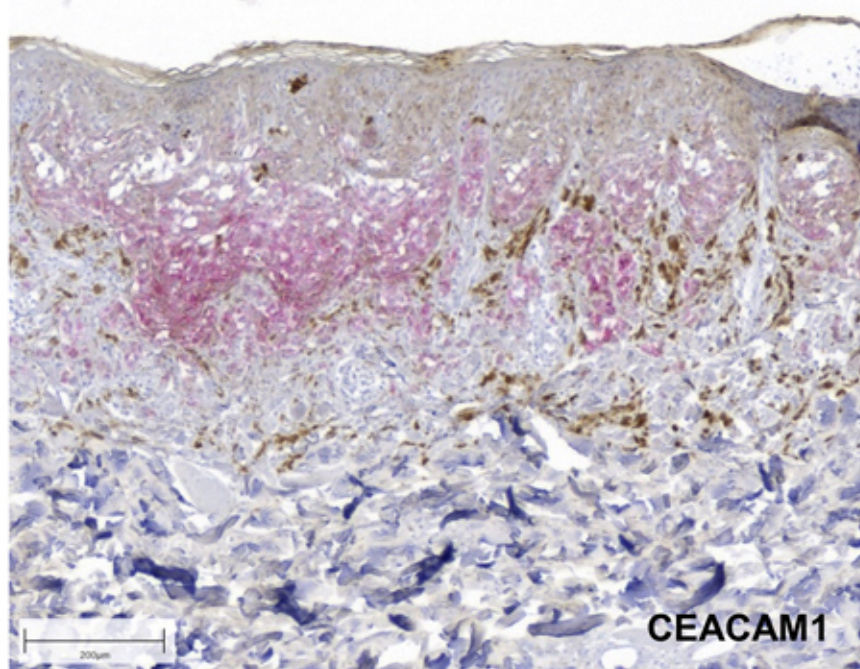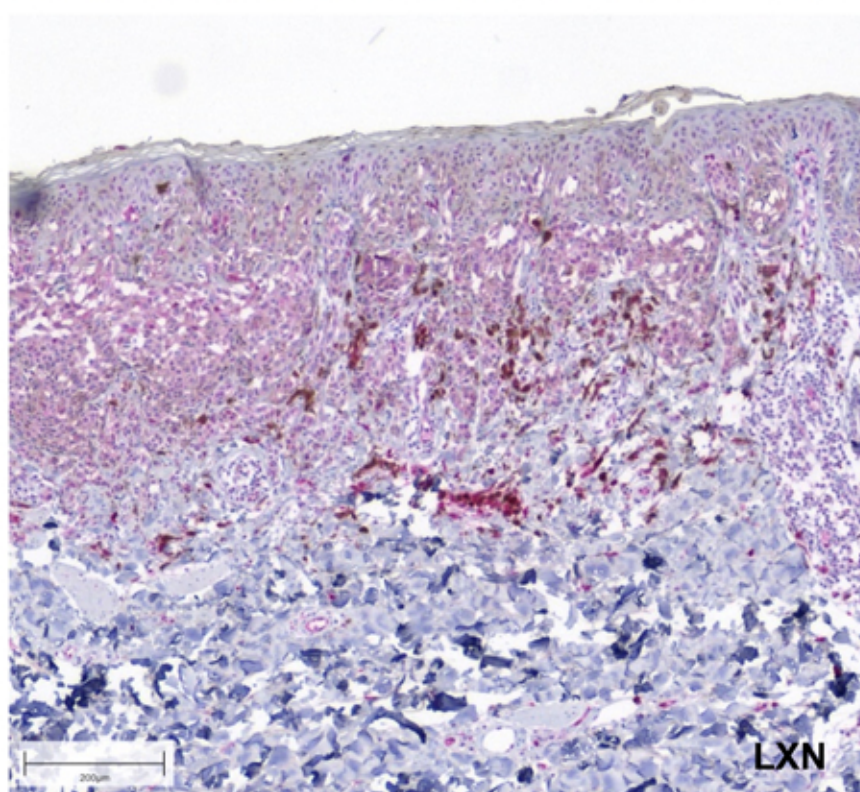

**Supplementary Figure 5:**

Immunohistochemical staining of paraffin embedded patient melanoma tissue (approximately the same area of the respective melanoma) for CEACAM1 (upper panel) and LXN(lower panel). scale bar: 200μm  
Areas with high CEACAM1 and high LXN expression often overlap.



**A**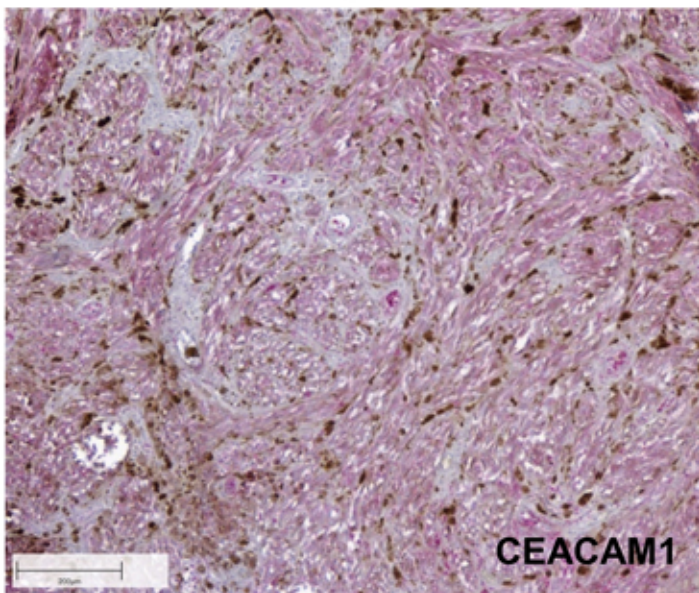**B**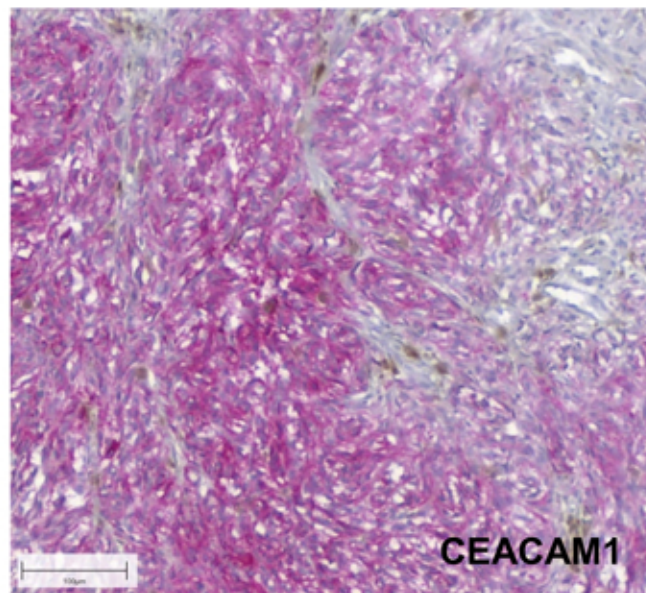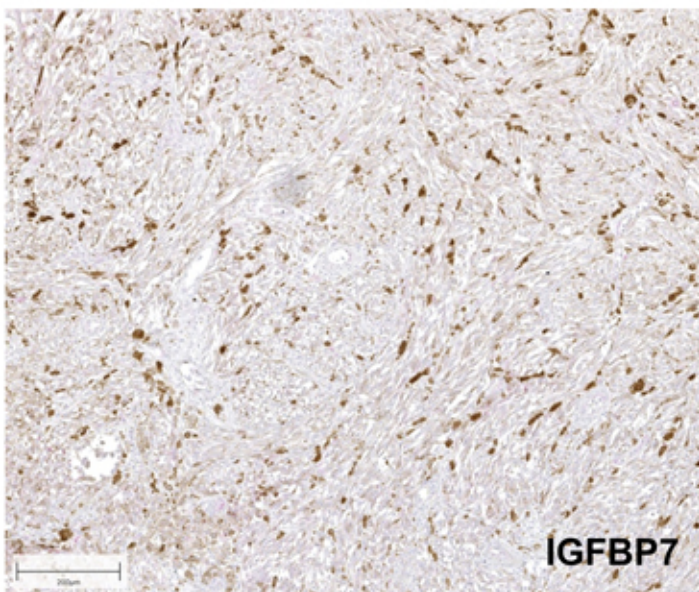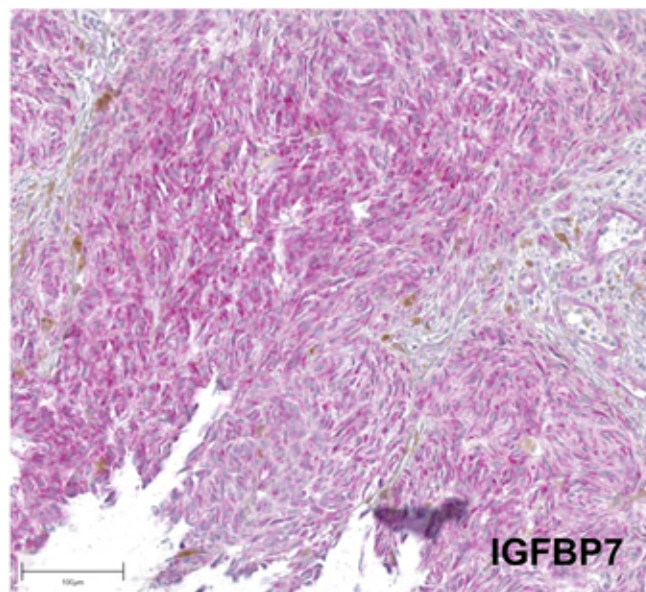**Supplementary Figure 6:**

Immunohistochemical staining of two (**A** and **B**) paraffin embedded patient melanoma (approximately the same area of the respective melanoma) for CEACAM1 (upper panels) and IGFBP7 (lower panels). scale bar: 200µm

Areas with high CEACAM1 and high IGFBP7 expression sometimes overlap, but more often do not overlap.



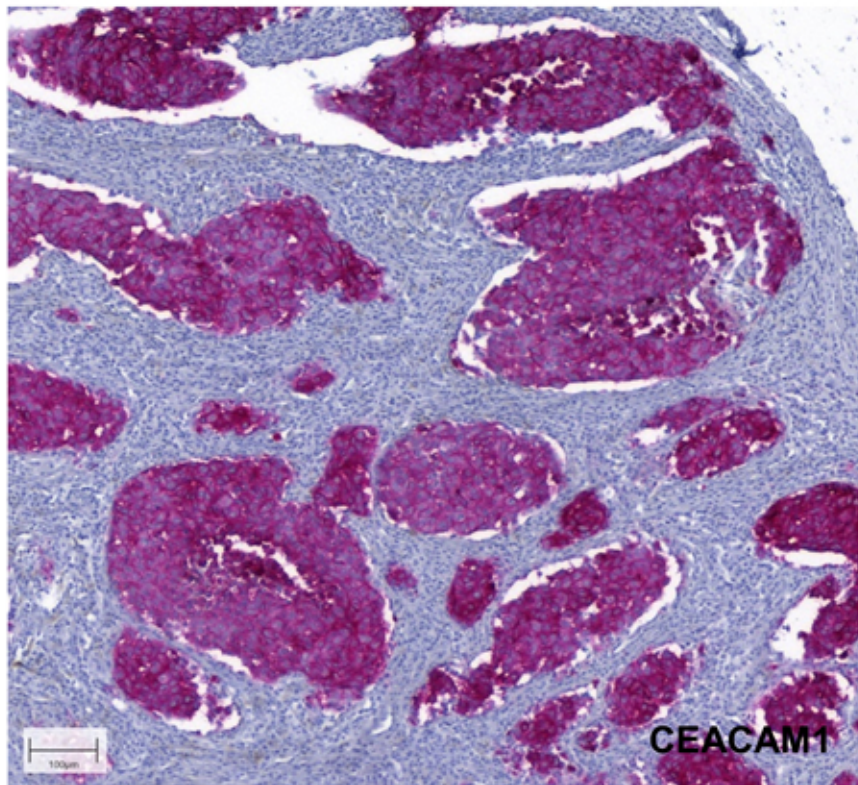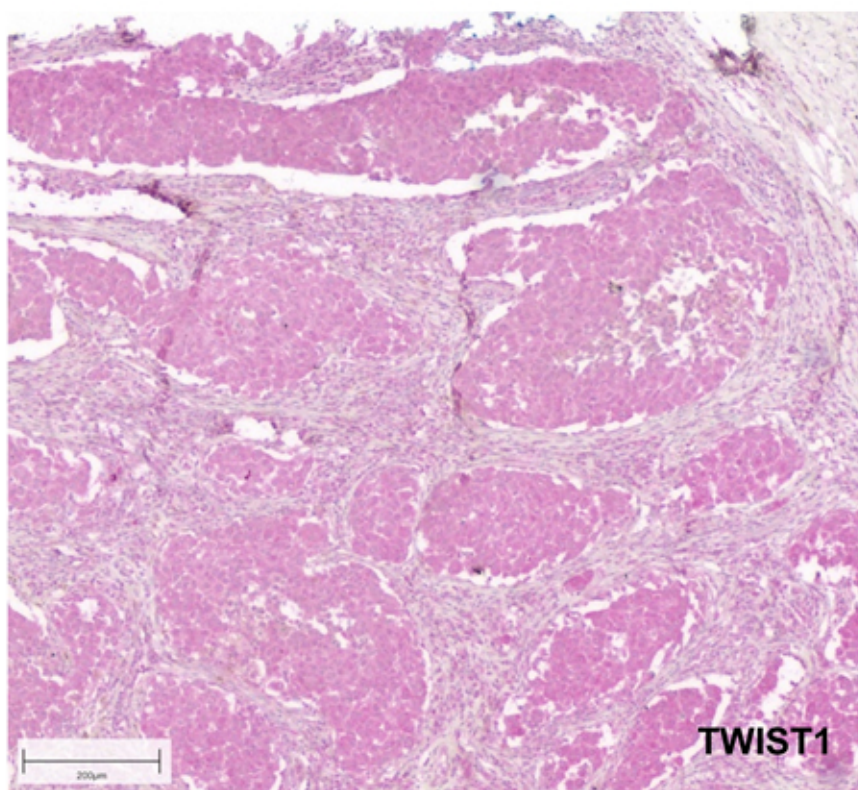

**Supplementary Figure 7:**

Immunohistochemical staining of paraffin embedded patient melanoma tissue (approximately the same area of the respective melanoma) for CEACAM1 (upper panel) and TWIST1(lower panel). scale bar: 200µm  
Areas with high CEACAM1 and high ratios of cytoplasmic/nuclear TWIST1 expression often overlap.



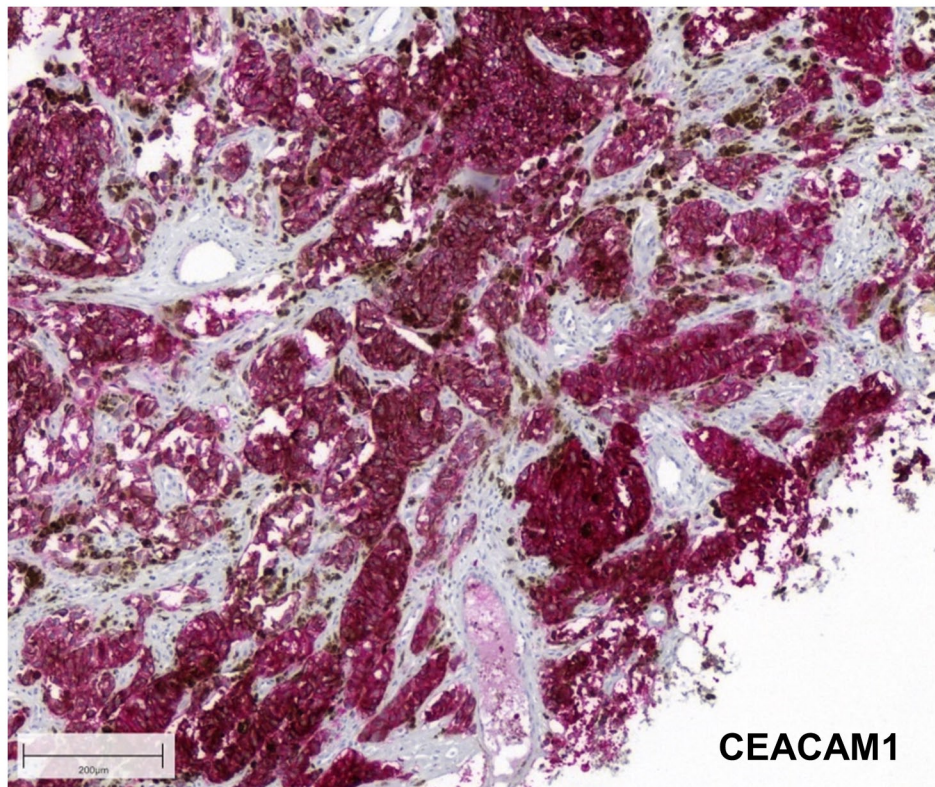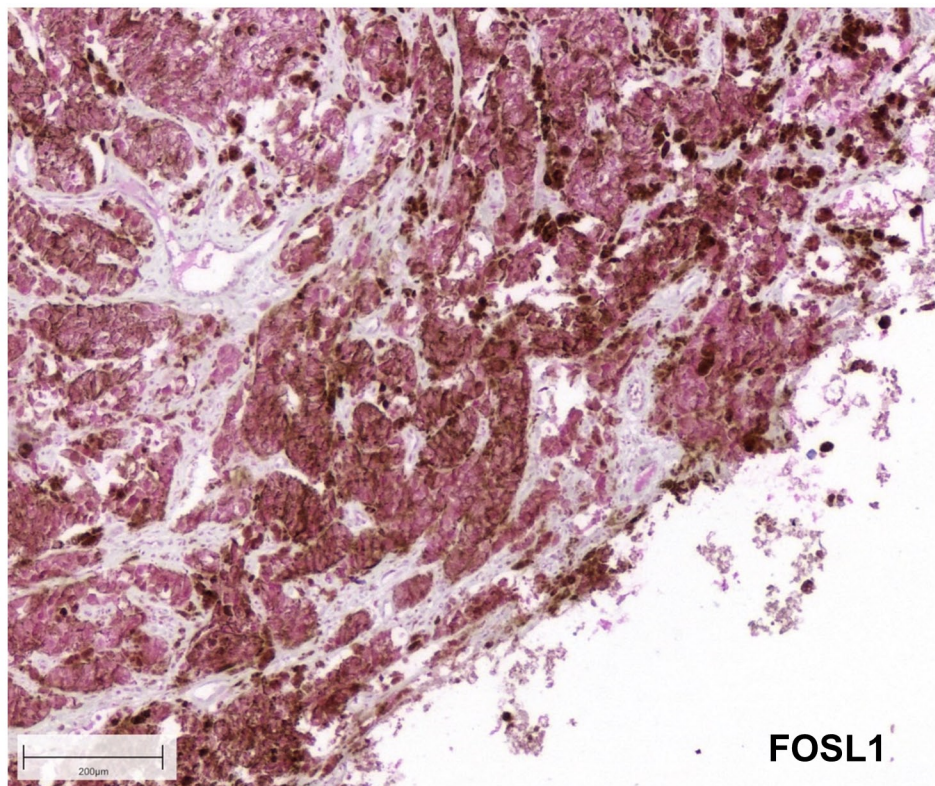

**Supplementary Figure 8:**

Immunohistochemical staining of paraffin embedded patient melanoma tissue (approximately the same area of the respective melanoma) for CEACAM1 (upper panel) and FOSL1 (lower panel). scale bar: 200µm

Areas with high CEACAM1 and FOSL1 expression often overlap.

**Supplementary Table 1:** Comparison of the gene expression of subcutaneous MeWo tumors in scid mice with CEACAM1 knockdown (MeWo CEACAM kd) versus expression of MeWo Luc control (MeWo Luc) tumors. Included are only fold changes at least +/- 1.51; ANOVA and adjusted p-values <0.05.

| <u>Gene:</u> | <u>Fold<br/>Change:</u> |
|--------------|-------------------------|
| LXN          | -73.5                   |
| KDELC2       | -9.2                    |
| FKBP11       | -8.0                    |
| MAGEC1       | -7.0                    |
| ENPP5        | -7.0                    |
| ZNF544       | -6.1                    |
| CYTL1        | -6.1                    |
| PIBF1        | -4.9                    |
| C1orf115     | -4.9                    |
| S100A2       | -4.6                    |
| LONRF3       | -4.6                    |
| COL9A3       | -4.0                    |
| LOC100287628 | -4.0                    |
| PDLIM4       | -3.7                    |
| CA2          | -3.5                    |
| CD58         | -3.5                    |
| NNMT         | -3.5                    |
| TNC          | -3.2                    |
| C8orf48      | -3.2                    |
| KDELC1       | -3.2                    |
| EIF1AY       | -3.0                    |
| TGFBI        | -3.0                    |
| PLS1         | -3.0                    |
| ID4          | -3.0                    |
| IL11         | -3.0                    |
| LRRIQ3       | -3.0                    |
| LOC100286909 | -2.8                    |
| TRIM6        | -2.8                    |
| AIM2         | -2.8                    |
| AXL          | -2.8                    |
| ITGA4        | -2.8                    |
| SLITRK5      | -2.8                    |
| SRD5A3       | -2.8                    |
| HSPA4L       | -2.8                    |
| SORL1        | -2.8                    |
| PION         | -2.8                    |
| HOXA10       | -2.6                    |
| KLHL13       | -2.6                    |



|           |      |
|-----------|------|
| CYP51A1   | -2.6 |
| AMIGO2    | -2.6 |
| GOLGA8A   | -2.6 |
| SLC22A15  | -2.6 |
| ZNF567    | -2.6 |
| SEL1L3    | -2.6 |
| SNORA61   | -2.6 |
| ADM       | -2.5 |
| S100A4    | -2.5 |
| DKK1      | -2.5 |
| HSPA6     | -2.5 |
| CENPE     | -2.5 |
| ANKRD10   | -2.5 |
| ARGLU1    | -2.5 |
| MRAP2     | -2.5 |
| AHSA2     | -2.5 |
| UPF3B     | -2.5 |
| NALCN     | -2.5 |
| MYOF      | -2.3 |
| PCDHB15   | -2.3 |
| STAMBPL1  | -2.3 |
| ZNF354A   | -2.3 |
| BCAS2     | -2.3 |
| GXYLT2    | -2.3 |
| C9orf64   | -2.3 |
| AGPAT9    | -2.3 |
| TMEM158   | -2.3 |
| C13orf34  | -2.3 |
| FAM13C    | -2.3 |
| IL8       | -2.3 |
| DCUN1D4   | -2.3 |
| GLRB      | -2.3 |
| COL16A1   | -2.3 |
| EVI2A     | -2.3 |
| CARS2     | -2.3 |
| SCFD2     | -2.3 |
| HNRNPA2B1 | -2.3 |
| PCCA      | -2.1 |
| COL4A3    | -2.1 |
| GPR143    | -2.1 |
| DIAPH3    | -2.1 |
| KCNN4     | -2.1 |
| ERCC5     | -2.1 |
| FAM184A   | -2.1 |
| C8orf42   | -2.1 |

|            |      |
|------------|------|
| CHN1       | -2.1 |
| GLT25D2    | -2.1 |
| AP4B1      | -2.1 |
| UCHL3      | -2.1 |
| RAB20      | -2.1 |
| LYPD1      | -2.1 |
| COL4A1     | -2.1 |
| TGDS       | -2.1 |
| TFPI2      | -2.1 |
| IL6        | -2.1 |
| NCRNA00201 | -2.1 |
| CYR61      | -2.0 |
| GRB14      | -2.0 |
| OSBPL3     | -2.0 |
| ITGA6      | -2.0 |
| BIVM       | -2.0 |
| UGGT2      | -2.0 |
| CEPT1      | -2.0 |
| CLEC2D     | -2.0 |
| MMP8       | -2.0 |
| DEPDC7     | -2.0 |
| MOSC2      | -2.0 |
| TCAM1P     | -2.0 |
| FIP1L1     | -2.0 |
| SLAIN1     | -2.0 |
| ATP6V0E2   | -2.0 |
| PRDX2      | -2.0 |
| LARP7      | -2.0 |
| SPRY2      | -2.0 |
| VEGFA      | -2.0 |
| LIG4       | -2.0 |
| NFKBIZ     | -2.0 |
| NUCB2      | -2.0 |
| PHTF1      | -2.0 |
| CEACAM1    | -2.0 |
| PDGFC      | -2.0 |
| TPP2       | -2.0 |
| FAM111B    | -2.0 |
| TTF2       | -2.0 |
| TSPAN13    | -2.0 |
| CXCL1      | -2.0 |
| COBL       | -2.0 |
| ATP5F1     | -2.0 |
| BIRC3      | -2.0 |
| GOLGA8B    | -1.9 |



|              |      |
|--------------|------|
| UPF3A        | -1.9 |
| DIS3         | -1.9 |
| PCID2        | -1.9 |
| TDRD3        | -1.9 |
| KIF15        | -1.9 |
| CHL1         | -1.9 |
| ANXA1        | -1.9 |
| SGCB         | -1.9 |
| AHR          | -1.9 |
| BRCC3        | -1.9 |
| C17orf60     | -1.9 |
| LOC152225    | -1.9 |
| FOXN3        | -1.9 |
| LOC100131512 | -1.9 |
| ZNF721       | -1.9 |
| WDR3         | -1.9 |
| NPY1R        | -1.9 |
| USP46        | -1.9 |
| DRAM2        | -1.9 |
| HBXIP        | -1.9 |
| DSP          | -1.9 |
| FPGT         | -1.9 |
| ZNF331       | -1.9 |
| ACYP1        | -1.9 |
| MATN2        | -1.9 |
| CHIC2        | -1.9 |
| PHGDH        | -1.9 |
| MYO1B        | -1.9 |
| ARHGEF6      | -1.9 |
| FOSL1        | -1.7 |
| TUBGCP3      | -1.7 |
| PPP1R9A      | -1.7 |
| SLC16A1      | -1.7 |
| TMEM165      | -1.7 |
| IMMP1L       | -1.7 |
| TIMP3        | -1.7 |
| CCDC41       | -1.7 |
| ERRF1        | -1.7 |
| NOTCH2       | -1.7 |
| NDFIP2       | -1.7 |
| SOX8         | -1.7 |
| IL12A        | -1.7 |
| NA           | -1.7 |
| CCNE2        | -1.7 |
| MYBL1        | -1.7 |

|           |      |
|-----------|------|
| MALAT1    | -1.7 |
| SEC22B    | -1.7 |
| ZIC2      | -1.7 |
| TBC1D4    | -1.7 |
| LOC643783 | -1.7 |
| CEP70     | -1.7 |
| PFKFB4    | -1.7 |
| C5orf62   | -1.7 |
| LPXN      | -1.7 |
| CLK1      | -1.7 |
| FANCL     | -1.7 |
| TRIM33    | -1.7 |
| SNHG12    | -1.7 |
| HAUS1     | -1.7 |
| FARP1     | -1.7 |
| ZNF430    | -1.7 |
| MYCBP2    | -1.7 |
| KIAA1644  | -1.7 |
| PMEPA1    | -1.7 |
| MTCP1     | -1.7 |
| MAP7D3    | -1.7 |
| CNN3      | -1.7 |
| AHNAK2    | -1.7 |
| ANKRD6    | -1.7 |
| MFHAS1    | -1.7 |
| ELOVL7    | -1.7 |
| MICALL2   | -1.7 |
| AKAP12    | -1.7 |
| ATP1B1    | -1.7 |
| ATF2      | -1.7 |
| SCHIP1    | -1.7 |
| TMOD2     | -1.7 |
| KRT27     | -1.7 |
| KCTD12    | -1.7 |
| PAN2      | -1.7 |
| NUAK1     | -1.7 |
| PPAPDC1A  | -1.7 |
| GPATCH2   | -1.7 |
| EBP       | -1.7 |
| ZNF521    | -1.7 |
| CDC16     | -1.7 |
| BEX2      | -1.7 |
| SLAMF7    | -1.6 |
| SLC16A4   | -1.6 |
| LAT       | -1.6 |



|            |      |
|------------|------|
| CSGALNACT1 | -1.6 |
| CEP63      | -1.6 |
| FRMD5      | -1.6 |
| C4orf32    | -1.6 |
| CARKD      | -1.6 |
| SEMA3B     | -1.6 |
| GKAP1      | -1.6 |
| MBNL2      | -1.6 |
| RNF182     | -1.6 |
| ZDHHC23    | -1.6 |
| ARAP2      | -1.6 |
| CA8        | -1.6 |
| DDX20      | -1.6 |
| KIF14      | -1.6 |
| WDR77      | -1.6 |
| MZT1       | -1.6 |
| CDH2       | -1.6 |
| LOC730236  | -1.6 |
| TSPAN7     | -1.6 |
| FHOD3      | -1.6 |
| RAP1A      | -1.6 |
| ZNF268     | -1.6 |
| PIF1       | -1.6 |
| MPP6       | -1.6 |
| NRAS       | -1.6 |
| AADAT      | -1.6 |
| SNORD104   | -1.6 |
| ID1        | -1.6 |
| C13orf27   | -1.6 |
| CUL4A      | -1.6 |
| ADORA2B    | -1.6 |
| GADD45B    | -1.6 |
| SPC25      | -1.6 |
| CAPZA1     | -1.6 |
| MCM9       | -1.6 |
| FLJ43663   | -1.6 |
| ERO1LB     | -1.6 |
| CCNL2      | -1.6 |
| HOXA4      | -1.6 |
| FBXO25     | -1.6 |
| GLIS2      | -1.6 |
| RDH11      | -1.6 |
| C17orf91   | -1.6 |
| EXOC6      | -1.6 |
| IER3       | -1.6 |

|          |      |
|----------|------|
| SETD7    | -1.6 |
| ABCC4    | -1.6 |
| CXCL2    | -1.6 |
| LAMB1    | -1.6 |
| FAN1     | -1.6 |
| KIAA0114 | -1.6 |
| VDR      | -1.6 |
| DNAJC3   | -1.6 |
| FBXL3    | -1.6 |
| OXCT1    | -1.6 |
| MITD1    | -1.6 |
| UBAC2    | -1.6 |
| LARP1B   | -1.6 |
| CRIM1    | -1.6 |
| EFHC1    | -1.6 |
| ARHGEF10 | -1.6 |
| DFNB59   | -1.6 |
| C12orf24 | -1.6 |
| COL4A2   | -1.6 |
| CDC14B   | -1.6 |
| CWF19L2  | -1.6 |
| EEF1E1   | -1.6 |
| DOCK11   | -1.6 |
| ZNF692   | -1.6 |
| ST8SIA1  | -1.6 |
| CLN5     | -1.6 |
| MSRB3    | -1.6 |
| PHLDA2   | -1.6 |
| CSDE1    | -1.6 |
| NUPL2    | -1.6 |
| TWIST1   | -1.6 |
| SMC4     | -1.6 |
| TPM1     | -1.6 |
| ERI1     | -1.6 |
| KBTBD3   | -1.6 |
| RBM26    | -1.6 |
| ZNF177   | -1.6 |
| FLJ22536 | -1.6 |
| HELLS    | -1.6 |
| PTGR1    | -1.6 |
| MAP3K4   | -1.6 |
| CHST2    | -1.5 |
| LRDD     | -1.5 |
| ETFDH    | -1.5 |
| WARS2    | -1.5 |



|              |      |
|--------------|------|
| TFDP1        | -1.5 |
| DLGAP5       | -1.5 |
| NKAP         | -1.5 |
| SLC25A37     | -1.5 |
| DOCK4        | -1.5 |
| FLNA         | -1.5 |
| BBS2         | -1.5 |
| TRMT11       | -1.5 |
| ATP1A1       | -1.5 |
| IRAK1BP1     | -1.5 |
| RSBN1        | -1.5 |
| C10orf118    | -1.5 |
| TMCO3        | -1.5 |
| NUP155       | -1.5 |
| MRE11A       | -1.5 |
| RNF219       | -1.5 |
| CWC27        | -1.5 |
| SNORA64      | -1.5 |
| RFC4         | -1.5 |
| NCAPG        | -1.5 |
| FAS          | -1.5 |
| C14orf106    | -1.5 |
| LAMP2        | -1.5 |
| SCG2         | -1.5 |
| PTGFRN       | -1.5 |
| GDAP2        | -1.5 |
| KIAA1804     | -1.5 |
| MIPOL1       | -1.5 |
| ATP1A1OS     | -1.5 |
| ZNF697       | -1.5 |
| CCDC109B     | -1.5 |
| TBC1D8       | -1.5 |
| RTKN2        | -1.5 |
| ZDHHC20      | -1.5 |
| SDCCAG8      | -1.5 |
| ADA          | -1.5 |
| MTHFD2L      | -1.5 |
| ITGA2        | -1.5 |
| NMU          | -1.5 |
| C16orf52     | -1.5 |
| PPFIA4       | -1.5 |
| AVL9         | -1.5 |
| NEDD4        | -1.5 |
| ANKRD28      | -1.5 |
| LOC100287482 | -1.5 |

|           |      |
|-----------|------|
| STAG1     | -1.5 |
| RBM34     | -1.5 |
| HERC4     | -1.5 |
| CHST6     | -1.5 |
| SYAP1     | -1.5 |
| FRMD6     | -1.5 |
| RPS6KA3   | -1.5 |
| MAN1A2    | -1.5 |
| STEAP1    | -1.5 |
| UHRF2     | -1.5 |
| GLRX      | -1.5 |
| EIF2C3    | -1.5 |
| MTMR9L    | -1.5 |
| PDE2A     | -1.5 |
| GPR180    | -1.5 |
| CLIP4     | -1.5 |
| SVIL      | -1.5 |
| SUPT3H    | -1.5 |
| ZNF789    | -1.5 |
| SYTL4     | -1.5 |
| TNFRSF12A | -1.5 |
| GLUD2     | -1.5 |
| TMEM106C  | -1.5 |
| FAM40B    | -1.5 |
| MRPS17    | -1.5 |
| SNX25     | -1.5 |
| TCIRG1    | -1.5 |
| PRPF18    | -1.5 |
| BRAF      | -1.5 |
| TTC39C    | -1.5 |
| UBASH3B   | -1.5 |
| RDH10     | -1.5 |
| KIAA0895  | -1.5 |
| DCUN1D2   | -1.5 |
| ETV1      | -1.5 |
| RSRC2     | -1.5 |
| SPAG1     | -1.5 |
| CUL4B     | -1.5 |
| OFD1      | -1.5 |
| COL5A3    | -1.5 |
| CAMK1     | -1.5 |
| EPHA2     | -1.5 |
| FLRT2     | -1.5 |
| CTTNBP2   | -1.5 |
| PDGFA     | -1.5 |



|          |      |
|----------|------|
| LRIG3    | -1.5 |
| KLF12    | -1.5 |
| CTTN     | -1.5 |
| KIF16B   | -1.5 |
| HUS1     | -1.5 |
| ANLN     | -1.5 |
| USP53    | -1.5 |
| UCN2     | -1.5 |
| RBM41    | -1.5 |
| METT5D1  | -1.5 |
| ZNF559   | -1.5 |
| HMGB3L1  | -1.5 |
| PRSS23   | -1.5 |
| CHEK1    | -1.5 |
| NRIP3    | -1.5 |
| USP16    | -1.5 |
| TOX2     | -1.5 |
| PLA2G16  | -1.5 |
| POLA1    | -1.5 |
| DCUN1D1  | -1.5 |
| FAM40A   | -1.5 |
| CYFIP2   | -1.5 |
| DOCK9    | -1.5 |
| NFE2L3   | -1.5 |
| CDH11    | -1.5 |
| C5orf25  | -1.5 |
| METTL3   | -1.5 |
| ITGA3    | -1.5 |
| ABHD3    | -1.5 |
| COMMD10  | -1.5 |
| RALGAPA1 | -1.5 |
| RHOC     | -1.5 |
| C17orf76 | -1.5 |
| AGPAT5   | -1.5 |
| VTI1B    | -1.5 |
| CXCL3    | -1.5 |
| TTC26    | -1.5 |
| THOC1    | -1.5 |
| SEPT4    | -1.5 |
| IFI30    | -1.5 |
| HIPK2    | 1.5  |
| ANXA10   | 1.5  |
| FRMD4B   | 1.5  |
| HOXD1    | 1.5  |
| ZNF440   | 1.5  |

|            |     |
|------------|-----|
| TTC15      | 1.5 |
| TRDMT1     | 1.5 |
| NFIA       | 1.5 |
| HDX        | 1.5 |
| TNNT1      | 1.5 |
| QPCT       | 1.5 |
| HLA-F      | 1.5 |
| LOC148189  | 1.5 |
| FZD3       | 1.5 |
| CBX4       | 1.5 |
| KLHL29     | 1.5 |
| C14orf93   | 1.5 |
| C22orf39   | 1.5 |
| CCDC113    | 1.5 |
| LOC728769  | 1.5 |
| C21orf91   | 1.5 |
| MTMR6      | 1.5 |
| PXMP4      | 1.5 |
| SEMA3C     | 1.5 |
| PI15       | 1.5 |
| PHF15      | 1.5 |
| NCRNA00094 | 1.5 |
| ITGB1BP3   | 1.5 |
| SEMA6D     | 1.5 |
| LONRF1     | 1.5 |
| FCRLB      | 1.5 |
| PRCC       | 1.5 |
| C6orf192   | 1.5 |
| ANK3       | 1.5 |
| ZNF280B    | 1.5 |
| TP53INP2   | 1.5 |
| C15orf37   | 1.5 |
| ARHGAP31   | 1.5 |
| C1orf198   | 1.5 |
| CCNO       | 1.5 |
| PPP1R3D    | 1.5 |
| IFIT5      | 1.5 |
| C22orf25   | 1.5 |
| ARL5B      | 1.5 |
| CBLB       | 1.5 |
| LPIN1      | 1.5 |
| NAA16      | 1.5 |
| TM4SF4     | 1.5 |
| RFX5       | 1.5 |
| RNASEL     | 1.5 |



|           |     |
|-----------|-----|
| ADAR      | 1.5 |
| FAM53B    | 1.5 |
| PNRC1     | 1.5 |
| SOX6      | 1.5 |
| DCAF7     | 1.5 |
| TTC30A    | 1.5 |
| CABLES1   | 1.5 |
| EXOSC6    | 1.5 |
| GRAMD4    | 1.5 |
| HLA-G     | 1.5 |
| DHRS11    | 1.5 |
| TIGD2     | 1.5 |
| CXorf24   | 1.5 |
| RAP2B     | 1.5 |
| APOD      | 1.5 |
| TM4SF18   | 1.5 |
| ITM2A     | 1.5 |
| FRAT2     | 1.5 |
| OTUD1     | 1.5 |
| FAM167A   | 1.5 |
| APH1A     | 1.5 |
| CYBA      | 1.5 |
| EGLN3     | 1.5 |
| HPGD      | 1.5 |
| PGGT1B    | 1.5 |
| AKAP11    | 1.5 |
| C1orf85   | 1.5 |
| TXNIP     | 1.5 |
| FKBP10    | 1.5 |
| LOC646762 | 1.5 |
| PRMT6     | 1.5 |
| PHLPP1    | 1.5 |
| TEAD3     | 1.5 |
| FZD7      | 1.5 |
| ALG1      | 1.5 |
| SOCS6     | 1.5 |
| MORC1     | 1.5 |
| ISG20L2   | 1.5 |
| C1S       | 1.5 |
| SDC2      | 1.5 |
| TOR3A     | 1.5 |
| EFHD1     | 1.5 |
| CDC42EP4  | 1.5 |
| ZNF512B   | 1.5 |
| CRISPLD1  | 1.6 |

|              |     |
|--------------|-----|
| OCA2         | 1.6 |
| C10orf26     | 1.6 |
| TSSC1        | 1.6 |
| TRIM13       | 1.6 |
| PTGS2        | 1.6 |
| C9orf16      | 1.6 |
| PQLC3        | 1.6 |
| IRX3         | 1.6 |
| RFTN1        | 1.6 |
| ZNF823       | 1.6 |
| ITPKB        | 1.6 |
| BEX4         | 1.6 |
| STON1        | 1.6 |
| ARHGAP15     | 1.6 |
| LGALS3BP     | 1.6 |
| OSTM1        | 1.6 |
| LOC100288092 | 1.6 |
| GLIS1        | 1.6 |
| UGCG         | 1.6 |
| TRAPPC6A     | 1.6 |
| ZNF362       | 1.6 |
| LRCH1        | 1.6 |
| TPPP3        | 1.6 |
| RBM8A        | 1.6 |
| CKAP4        | 1.6 |
| ZNFX1        | 1.6 |
| MIPEP        | 1.6 |
| FTH1         | 1.6 |
| PPIA         | 1.6 |
| NUFIP1       | 1.6 |
| FRAT1        | 1.6 |
| SLFN5        | 1.6 |
| PAIP1        | 1.6 |
| LOC729887    | 1.6 |
| LEPREL4      | 1.6 |
| DCLK1        | 1.6 |
| TRIM63       | 1.6 |
| TSPAN10      | 1.6 |
| PDZRN3       | 1.6 |
| KRTAP7-1     | 1.6 |
| LOC100289219 | 1.6 |
| NCKAP5       | 1.6 |
| NKX2-2       | 1.6 |
| DENND2D      | 1.6 |
| MGC16275     | 1.6 |

|              |     |
|--------------|-----|
| CYBASC3      | 1.6 |
| GMPR         | 1.6 |
| GRN          | 1.6 |
| INPP5A       | 1.6 |
| C13orf31     | 1.6 |
| ZBED3        | 1.6 |
| IRF9         | 1.6 |
| TLR1         | 1.6 |
| HLA-B        | 1.6 |
| CARD6        | 1.6 |
| MR1          | 1.6 |
| TMCC3        | 1.6 |
| C1orf93      | 1.6 |
| ADI1         | 1.7 |
| KCNRG        | 1.7 |
| TTC30B       | 1.7 |
| HEXIM2       | 1.7 |
| ST6GALNAC3   | 1.7 |
| LYZ          | 1.7 |
| STAT5A       | 1.7 |
| STK38L       | 1.7 |
| TLE1         | 1.7 |
| PLP1         | 1.7 |
| LOC255512    | 1.7 |
| HLA-E        | 1.7 |
| MYLIP        | 1.7 |
| FAM53A       | 1.7 |
| ODC1         | 1.7 |
| C16orf54     | 1.7 |
| ACP5         | 1.7 |
| ADAM17       | 1.7 |
| C13orf1      | 1.7 |
| CTNNA2       | 1.7 |
| FABP3        | 1.7 |
| LOC100127888 | 1.7 |
| MLANA        | 1.7 |
| PLXDC2       | 1.7 |
| LRGUK        | 1.7 |
| KIT          | 1.7 |
| NCRNA00052   | 1.7 |
| PCDHB6       | 1.7 |
| CITED1       | 1.7 |
| TMEM140      | 1.7 |
| PPM1K        | 1.7 |
| ZHX2         | 1.9 |



|                 |     |
|-----------------|-----|
| <b>FXYD5</b>    | 1.9 |
| <b>MAL2</b>     | 1.9 |
| <b>RGS20</b>    | 1.9 |
| <b>PCSK9</b>    | 1.9 |
| <b>PGBD5</b>    | 1.9 |
| <b>UBL3</b>     | 1.9 |
| <b>ELF1</b>     | 1.9 |
| <b>PITX2</b>    | 1.9 |
| <b>KLF11</b>    | 1.9 |
| <b>CREB5</b>    | 1.9 |
| <b>ARHGAP29</b> | 1.9 |
| <b>C8orf75</b>  | 1.9 |
| <b>DNAJC22</b>  | 1.9 |
| <b>FKBP7</b>    | 1.9 |
| <b>SYK</b>      | 1.9 |
| <b>SPP1</b>     | 1.9 |
| <b>CTSS</b>     | 1.9 |
| <b>PLTP</b>     | 1.9 |
| <b>ID2</b>      | 1.9 |
| <b>CRHBP</b>    | 1.9 |
| <b>FOXO1</b>    | 1.9 |
| <b>RGMB</b>     | 1.9 |
| <b>EPCAM</b>    | 1.9 |
| <b>MGST2</b>    | 2.0 |
| <b>NKAIN2</b>   | 2.0 |
| <b>HOXD4</b>    | 2.0 |
| <b>MYEF2</b>    | 2.0 |
| <b>SNAI2</b>    | 2.0 |
| <b>KBTD6</b>    | 2.0 |
| <b>APOBEC3G</b> | 2.0 |
| <b>ACTL8</b>    | 2.0 |
| <b>MX2</b>      | 2.0 |
| <b>PDK4</b>     | 2.0 |
| <b>GABRB3</b>   | 2.1 |
| <b>IFITM2</b>   | 2.1 |
| <b>FAM69C</b>   | 2.1 |
| <b>RASGRP3</b>  | 2.1 |
| <b>CYSLTR2</b>  | 2.1 |
| <b>EOMES</b>    | 2.1 |
| <b>PLCB4</b>    | 2.1 |
| <b>CNDP1</b>    | 2.1 |
| <b>ST7OT1</b>   | 2.3 |
| <b>SERPINF1</b> | 2.3 |
| <b>DGKI</b>     | 2.3 |
| <b>PDLIM1</b>   | 2.3 |

|                     |      |
|---------------------|------|
| <b>FSTL5</b>        | 2.3  |
| <b>STAP2</b>        | 2.3  |
| <b>LOC100288721</b> | 2.3  |
| <b>SCIN</b>         | 2.3  |
| <b>HAS2</b>         | 2.3  |
| <b>BPMS2</b>        | 2.3  |
| <b>GDF15</b>        | 2.3  |
| <b>RGS2</b>         | 2.5  |
| <b>C11orf96</b>     | 2.5  |
| <b>INHBA</b>        | 2.5  |
| <b>AGR2</b>         | 2.5  |
| <b>PROCR</b>        | 2.5  |
| <b>APOE</b>         | 2.5  |
| <b>HORMAD1</b>      | 2.5  |
| <b>PLCL1</b>        | 2.6  |
| <b>NEK3</b>         | 2.6  |
| <b>HTN1</b>         | 2.6  |
| <b>QPRT</b>         | 2.6  |
| <b>MPZ</b>          | 2.6  |
| <b>DNAJC15</b>      | 2.6  |
| <b>FBLN5</b>        | 2.6  |
| <b>LPAR6</b>        | 2.6  |
| <b>FAM176A</b>      | 2.8  |
| <b>CPB1</b>         | 2.8  |
| <b>RIPPLY2</b>      | 2.8  |
| <b>TSPAN8</b>       | 2.8  |
| <b>PCDHB2</b>       | 3.0  |
| <b>KBTBD7</b>       | 3.0  |
| <b>HEATR7B1</b>     | 3.0  |
| <b>CD79B</b>        | 3.2  |
| <b>ZNF680</b>       | 3.7  |
| <b>MAGEA12</b>      | 4.0  |
| <b>LUZP4</b>        | 4.0  |
| <b>CTHRC1</b>       | 4.3  |
| <b>CTSK</b>         | 4.3  |
| <b>NCCRP1</b>       | 4.6  |
| <b>PYCARD</b>       | 4.9  |
| <b>FAM133A</b>      | 5.3  |
| <b>VAMP8</b>        | 5.3  |
| <b>IGFBP7</b>       | 10.6 |

**Supplementary Table 2:** Comparison of the gene expression of subcutaneous MeWo tumors in scid mice with CEACAM1 knockdown (MeWo CEACAM kd) versus expression of MeWo Luc control (MeWo Luc) tumors with mean Signal strengths of the respective groups and Affymetrix Probe Set IDs.

| Probe Set ID | GENE_SYMBOL | Signal mean - MeWo Luc (Baseline) | Signal mean - MeWo CEACAM kd | Raw p value | Adj p value | Fold Change |
|--------------|-------------|-----------------------------------|------------------------------|-------------|-------------|-------------|
| 214907_at    | CEACAM21    | 4.008149                          | 3.9612358                    | 0.707944    | 0.707944    | -1.0330522  |
| 216605_s_at  | CEACAM21    | 4.299334                          | 4.456324                     | 0.2854962   | 0.2854962   | 1.11495849  |
| 239317_at    | CEACAM21    | 3.0174503                         | 2.9318337                    | 0.32589346  | 0.32589346  | -1.0611412  |
| 208052_x_at  | CEACAM3     | 6.1682215                         | 6.245122                     | 0.0834202   | 0.0834202   | 1.05474957  |
| 210789_x_at  | CEACAM3     | 6.0557785                         | 5.9334345                    | 0.18361485  | 0.18361485  | -1.0885019  |
| 201884_at    | CEACAM5     | 4.358782                          | 4.356951                     | 0.9902916   | 0.9902916   | -1.0012699  |
| 217291_at    | CEACAM5     | 5.9122486                         | 5.8941493                    | 0.8218636   | 0.8218636   | -1.0126245  |
| 203757_s_at  | CEACAM6     | 3.7025256                         | 3.8152652                    | 0.3391133   | 0.3391133   | 1.08127958  |
| 211657_at    | CEACAM6     | 4.875628                          | 5.1295133                    | 0.10071793  | 0.10071793  | 1.19241407  |
| 206676_at    | CEACAM8     | 3.1470895                         | 3.0945938                    | 0.4906266   | 0.4906266   | -1.0370574  |
